# Supplementary material for: Predicting Monthly Runoff of the Upper Yangtze River Based on Multiple Machine Learning Models
Source: MDPI journal article supplement (doi:10.3390/su141811149), 2022-09-06
Supplement: s1 [file s1]

## **Supplementary Materials**

### **Predicting monthly runoff of the Upper Yangtze River based on the multiple Machine Learning models**

Xiao Li<sup>1</sup>, Liping Zhang<sup>1,2\*</sup>, Sidong Zeng<sup>1,3</sup>, Zhenyu Tang<sup>1</sup>, Lina Liu<sup>1</sup>, Qin Zhang<sup>1</sup>, Zhengyang Tang<sup>4\*</sup>, Xiaojun Hua<sup>4</sup>

<sup>1</sup>State Key Laboratory of Water Resources and Hydropower Engineering Science, Wuhan University, Wuhan 430072, China

<sup>2</sup>Institute for Water-Carbon Cycles and Carbon Neutrality, Wuhan University, Wuhan 430072, China

<sup>3</sup>Chongqing Institute of Green and Intelligent Technology, Chinese Academy of Sciences, Chongqing 400714, China

<sup>4</sup>Hubei Key Laboratory of Intelligent Yangtze and Hydroelectric Science, China Yangtze Power Co.,Ltd., Yichang Hubei 443000, China

\* Corresponding authors:

zhanglp@whu.edu.cn; [tang\\_zhengyang@ctg.com.cn](mailto:tang_zhengyang@ctg.com.cn);

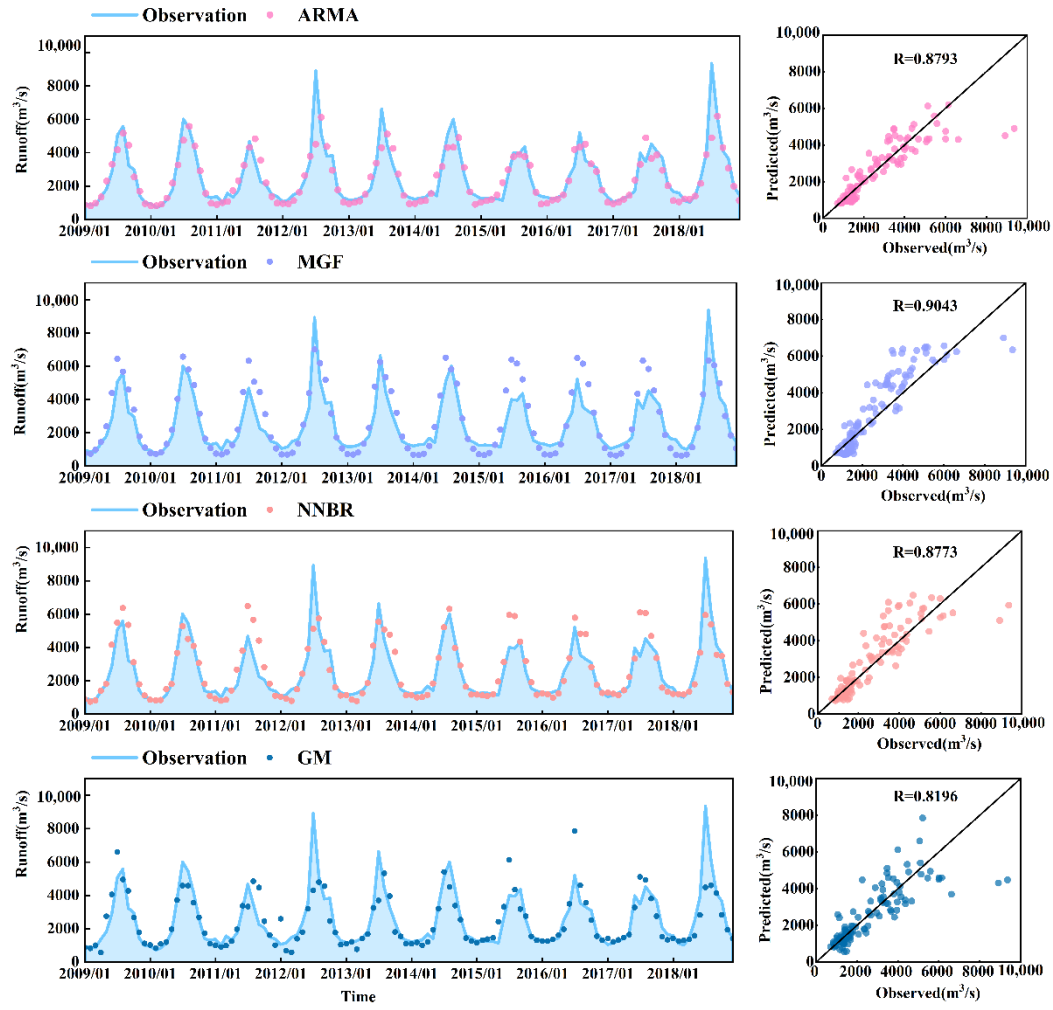

**Figure S1.** Observed runoff and simulated monthly runoff by univariate models for the Gaochang Station in the testing stage.

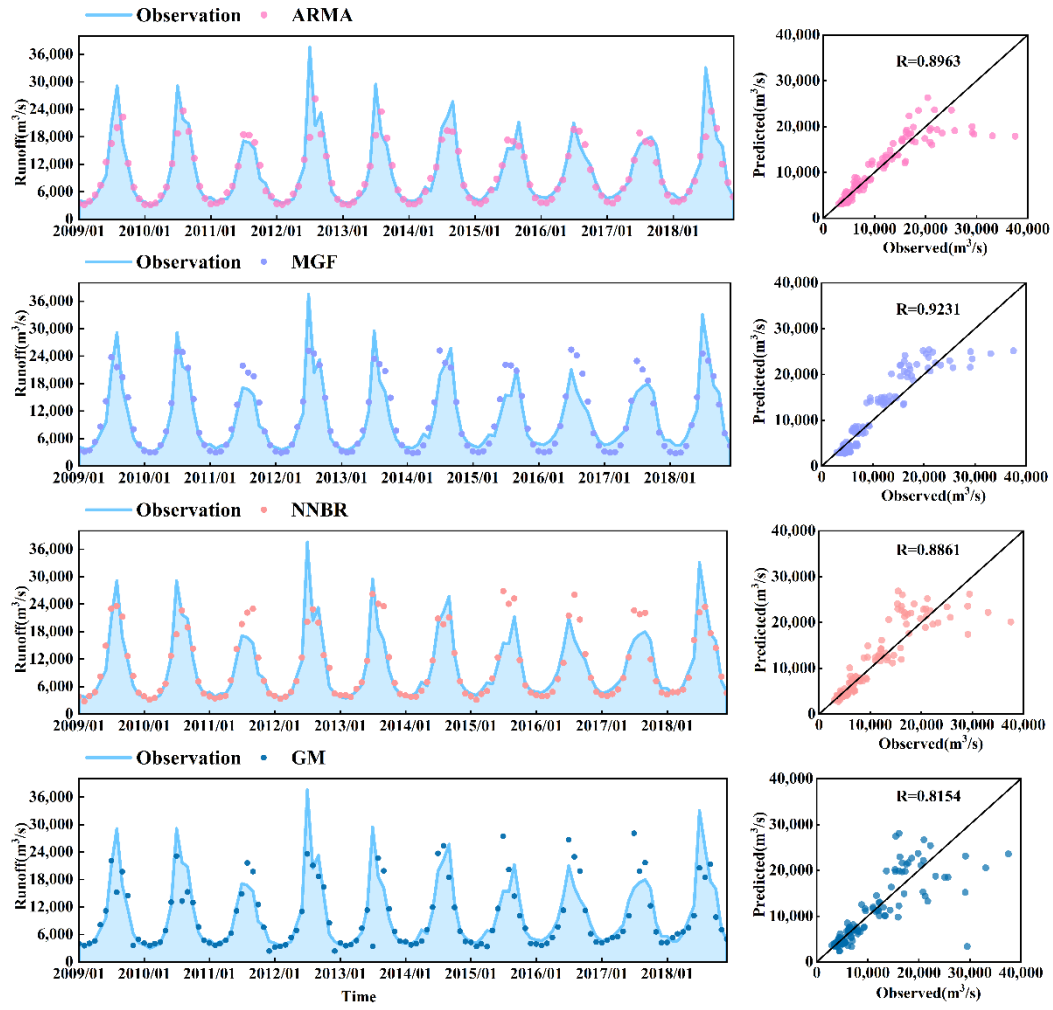

**Figure S2.** Observed runoff and simulated monthly runoff by univariate models for the Cuntan Station in the testing stage.

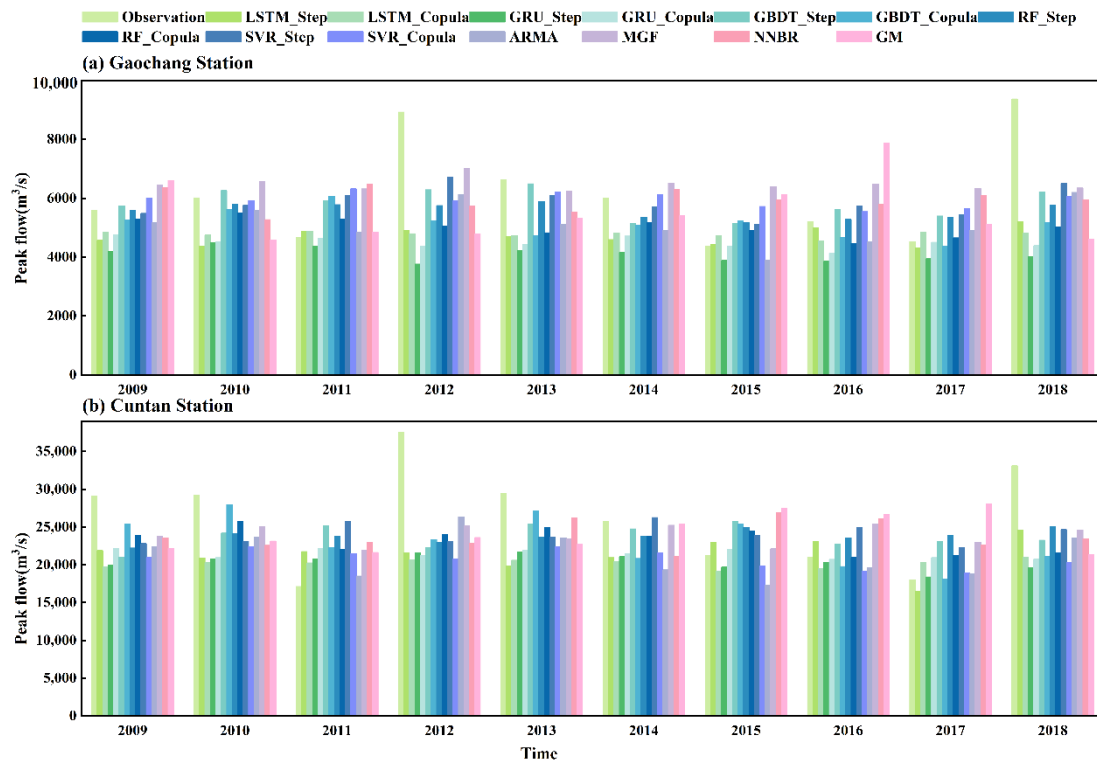

**Figure S3.** Annual peak flows of machine learning models and univariate models for the Gaochang Station and Cuntan Station in the testing stage.

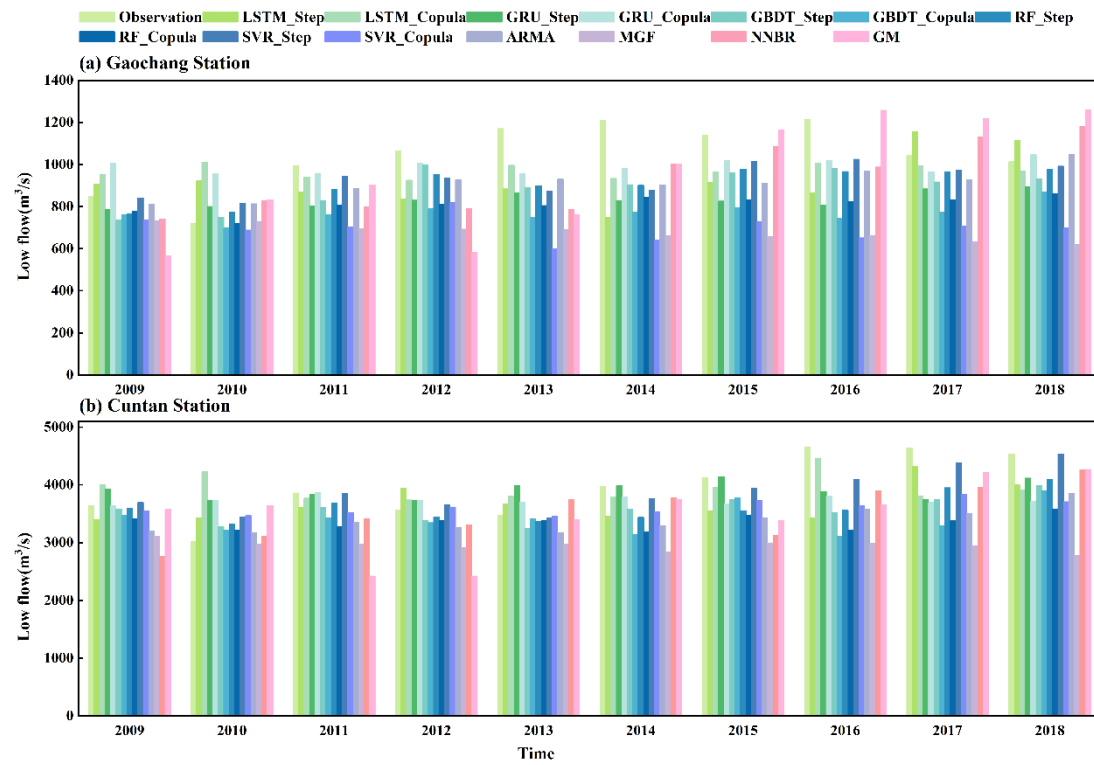

**Figure S4.** Annual low flows of machine learning models and univariate models for the Gaochang Station and Cuntan Station in the testing stage.

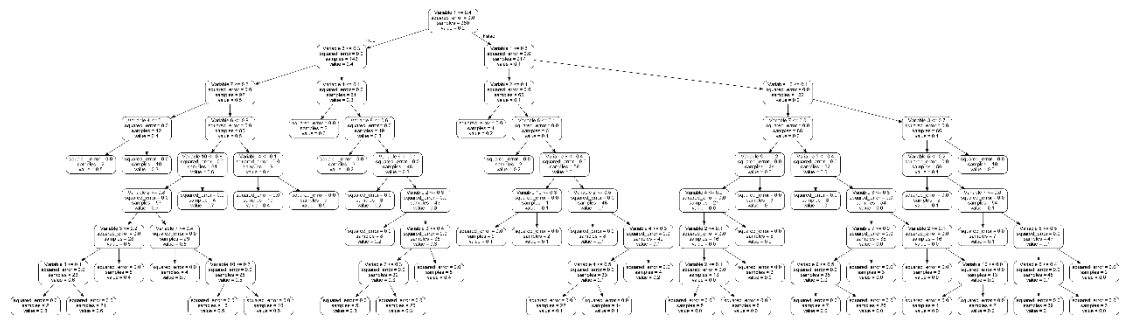

**Figure S5.** The decision tree visualizing plot in the RF\_Step model at Cuntan Station.

**Table S1.** The candidate predictive variables for runoff forecasting models.

| Number | Variable's name                                                                               |
|--------|-----------------------------------------------------------------------------------------------|
| 1      | Northern Hemisphere Subtropical High Area Index                                               |
| 2      | North African Subtropical High Area Index                                                     |
| 3      | North African-North Atlantic-North American Subtropical High Area Index                       |
| 4      | Indian Subtropical High Area Index                                                            |
| 5      | Western Pacific Subtropical High Area Index                                                   |
| 6      | Eastern Pacific Subtropical High Area Index                                                   |
| 7      | North American Subtropical High Area Index                                                    |
| 8      | Atlantic Subtropical High Area Index                                                          |
| 9      | South China Sea Subtropical High Area Index                                                   |
| 10     | North American-Atlantic Subtropical High Area Index                                           |
| 11     | Pacific Subtropical High Area Index                                                           |
| 12     | Northern Hemisphere Subtropical High Intensity Index                                          |
| 13     | North African Subtropical High Intensity Index                                                |
| 14     | North African-North Atlantic-North American Subtropical High Intensity Index                  |
| 15     | Indian Subtropical High Intensity Index                                                       |
| 16     | Western Pacific Subtropical High Intensity Index                                              |
| 17     | Eastern Pacific Subtropical High Intensity Index                                              |
| 18     | North American Subtropical High Intensity Index                                               |
| 19     | North Atlantic Subtropical High Intensity Index                                               |
| 20     | South China Sea Subtropical High Intensity Index                                              |
| 21     | North American-North Atlantic Subtropical High Intensity Index                                |
| 22     | Pacific Subtropical High Intensity Index                                                      |
| 23     | Northern Hemisphere Subtropical High Ridge Position Index                                     |
| 24     | North African Subtropical High Ridge Position Index                                           |
| 25     | North African-North Atlantic-North American Subtropical High Ridge Position Index             |
| 26     | Indian Subtropical High Ridge Position Index                                                  |
| 27     | Western Pacific Subtropical High Ridge Position Index                                         |
| 28     | Eastern Pacific Subtropical High Ridge Position Index                                         |
| 29     | North American Subtropical High Ridge Position Index                                          |
| 30     | Atlantic Sub Tropical High Ridge Position Index                                               |
| 31     | South China Sea Subtropical High Ridge Position Index                                         |
| 32     | North American-North Atlantic Subtropical High Ridge Position Index                           |
| 33     | Pacific Subtropical High Ridge Position Index                                                 |
| 34     | Northern Hemisphere Subtropical High Northern Boundary Position Index                         |
| 35     | North African Subtropical High Northern Boundary Position Index                               |
| 36     | North African-North Atlantic-North American Subtropical High Northern Boundary Position Index |
| 37     | Indian Subtropical High Northern Boundary Position Index                                      |
| 38     | Western Pacific Subtropical High Northern Boundary Position Index                             |
| 39     | Eastern Pacific Subtropical High Northern Boundary Position Index                             |
| 40     | North American Subtropical High Northern Boundary Position Index                              |
| 41     | Atlantic Subtropical High Northern Boundary Position Index                                    |
| 42     | South China Sea Subtropical High Northern Boundary Position Index                             |

| Number | Variable's name                                                           |
|--------|---------------------------------------------------------------------------|
| 43     | North American-Atlantic Subtropical High Northern Boundary Position Index |
| 44     | Pacific Subtropical High Northern Boundary Position Index                 |
| 45     | Western Pacific Sub Tropical High Western Ridge Point Index               |
| 46     | Asia Polar Vortex Area Index                                              |
| 47     | Pacific Polar Vortex Area Index                                           |
| 48     | North American Polar Vortex Area Index                                    |
| 49     | Atlantic-European Polar Vortex Area Index                                 |
| 50     | Northern Hemisphere Polar Vortex Area Index                               |
| 51     | Asia Polar Vortex Intensity Index                                         |
| 52     | Pacific Polar Vortex Intensity Index                                      |
| 53     | North American Polar Vortex Intensity Index                               |
| 54     | Atlantic-European Polar Vortex Intensity Index                            |
| 55     | Northern Hemisphere Polar Vortex Intensity Index                          |
| 56     | Northern Hemisphere Polar Vortex Central Longitude Index                  |
| 57     | Northern Hemisphere Polar Vortex Central Latitude Index                   |
| 58     | Northern Hemisphere Polar Vortex Central Intensity Index                  |
| 59     | Eurasian Zonal Circulation Index                                          |
| 60     | Eurasian Meridional Circulation Index                                     |
| 61     | Asian Zonal Circulation Index                                             |
| 62     | Asian Meridional Circulation Index                                        |
| 63     | East Asian Trough Position Index                                          |
| 64     | East Asian Trough Intensity Index                                         |
| 65     | Tibet Plateau Region 1 Index                                              |
| 66     | Tibet Plateau Region-2 Index                                              |
| 67     | India-Burma Trough Intensity Index                                        |
| 68     | Arctic Oscillation, AO                                                    |
| 69     | Antarctic Oscillation, AAO                                                |
| 70     | North Atlantic Oscillation , NAO                                          |
| 71     | Pacific/ North American Pattern , PNA                                     |
| 72     | East Atlantic Pattern, EA                                                 |
| 73     | West Pacific Pattern , WP                                                 |
| 74     | North Pacific Pattern , NP                                                |
| 75     | East Atlantic-West Russia Pattern , EA/WR                                 |
| 76     | Tropical-Northern Hemisphere Pattern, TNH                                 |
| 77     | Polar-Eurasia Pattern , POL                                               |
| 78     | Scandinavia Pattern , SCA                                                 |
| 79     | Pacific Transition Pattern, PT                                            |
| 80     | 30hPa zonal wind Index                                                    |
| 81     | 50 hPa zonal wind Index                                                   |
| 82     | Mid-Eastern Pacific 200mb Zonal Wind Index                                |
| 83     | West Pacific 850mb Trade Wind Index                                       |
| 84     | Central Pacific 850mb Trade Wind Index                                    |
| 85     | East Pacific 850mb Trade Wind Index                                       |



| Number | Variable's name                                                               |
|--------|-------------------------------------------------------------------------------|
| 86     | Atlantic-European Circulation W Pattern Index                                 |
| 87     | Atlantic-European Circulation C Pattern Index                                 |
| 88     | Atlantic-European Circulation E Pattern Index                                 |
| 89     | NINO 1+2 SSTA Index                                                           |
| 90     | NINO 3 SSTA Index                                                             |
| 91     | NINO 4 SSTA Index                                                             |
| 92     | NINO 3.4 SSTA Index                                                           |
| 93     | NINO W SSTA Index                                                             |
| 94     | NINO C SSTA Index                                                             |
| 95     | NINO A SSTA Index                                                             |
| 96     | NINO B SSTA Index                                                             |
| 97     | NINO Z SSTA Index                                                             |
| 98     | Tropical Northern Atlantic SST Index                                          |
| 99     | Tropical Southern Atlantic SST Index                                          |
| 100    | Western Hemisphere Warm Pool Index                                            |
| 101    | Indian Ocean Warm Pool Area Index                                             |
| 102    | Indian Ocean Warm Pool Strength Index                                         |
| 103    | Western Pacific Warm Pool Area Index                                          |
| 104    | Western Pacific Warm Pool Strength index                                      |
| 105    | Atlantic Multi-decadal Oscillation Index                                      |
| 106    | Oyashio Current SST Index                                                     |
| 107    | West Wind Drift Current SST Index                                             |
| 108    | Kuroshio Current SST Index                                                    |
| 109    | ENSO Modoki Index                                                             |
| 110    | Nino Eastern Pacific index                                                    |
| 111    | Nino Central Pacific index                                                    |
| 112    | Indian Ocean Basin-Wide Index                                                 |
| 113    | Tropic Indian Ocean Dipole Index                                              |
| 114    | South Indian Ocean Dipole Index                                               |
| 115    | Cold Air Activity Index                                                       |
| 116    | Western North Pacific Typhoon number                                          |
| 117    | Number of Landing Typhoon on China                                            |
| 118    | Total Sunspot Number Index                                                    |
| 119    | Southern Oscillation Index                                                    |
| 120    | Tropical Pacific Outgoing Long Wave Radiation Index                           |
| 121    | Multivariate ENSO Index                                                       |
| 122    | Pacific Decadal Oscillation Index                                             |
| 123    | Atlantic Meridional Mode SST Index                                            |
| 124    | Quasi-Biennial Oscillation Index                                              |
| 125    | Globally Integrated Angular Momentum Index                                    |
| 126    | Solar Flux Index                                                              |
| 127    | Equatorial Pacific 130° E-80° W Upper 300m temperature averaged anomaly index |
| 128    | Equatorial Pacific 160° E-80° W Upper 300m temperature Average anomaly index  |

| Number | Variable's name                                                              |
|--------|------------------------------------------------------------------------------|
| 129    | Equatorial Pacific 180° -100° W Upper 300m temperature Average anomaly index |
| 130    | North Atlantic Triple index                                                  |
| 131    | Runoff                                                                       |
| 132    | Air Pressure                                                                 |
| 133    | Average Temperature                                                          |
| 134    | Maximum Temperature                                                          |
| 135    | Minimum Temperature                                                          |
| 136    | Relative Humidity                                                            |
| 137    | Monthly Precipitation                                                        |
| 138    | Wind Speed                                                                   |
| 139    | Daylight Hours                                                               |

**Table S2.** Statistical metrics of 1-month-ahead runoff forecasting results of AI models for the Gaochang Station and Cuntan Station.

| Station  | Method      | Training    |                             |       |       | Testing     |                             |       |       |
|----------|-------------|-------------|-----------------------------|-------|-------|-------------|-----------------------------|-------|-------|
|          |             | MAPE<br>(%) | RMSE<br>(m <sup>3</sup> /s) | NSE   | R     | MAPE<br>(%) | RMSE<br>(m <sup>3</sup> /s) | NSE   | R     |
| Gaochang | LSTM_Step   | 19.403      | 792.094                     | 0.835 | 0.949 | 18.230      | 729.330                     | 0.770 | 0.923 |
|          | LSTM_Copula | 21.121      | 808.111                     | 0.828 | 0.941 | 17.624      | 691.492                     | 0.783 | 0.937 |
|          | GRU_Step    | 17.580      | 802.057                     | 0.829 | 0.931 | 19.716      | 816.700                     | 0.721 | 0.911 |
|          | GRU_Copula  | 22.294      | 850.196                     | 0.810 | 0.937 | 16.685      | 737.825                     | 0.766 | 0.932 |
|          | GBDT_Step   | 0.000       | 0.000                       | 1.000 | 1.000 | 19.713      | 731.833                     | 0.705 | 0.934 |
|          | GBDT_Copula | 0.000       | 0.000                       | 1.000 | 1.000 | 22.162      | 773.929                     | 0.702 | 0.907 |
|          | RF_Step     | 11.075      | 490.953                     | 0.932 | 0.969 | 18.353      | 708.891                     | 0.714 | 0.937 |
|          | RF_Copula   | 6.485       | 281.765                     | 0.977 | 0.990 | 20.610      | 738.703                     | 0.738 | 0.919 |
|          | SVR_Step    | 13.628      | 647.024                     | 0.883 | 0.944 | 21.487      | 802.021                     | 0.638 | 0.931 |
|          | SVR_Copula  | 15.818      | 714.062                     | 0.858 | 0.934 | 26.266      | 844.106                     | 0.577 | 0.931 |
| Cuntan   | LSTM_Step   | 15.719      | 3058.171                    | 0.859 | 0.955 | 14.907      | 3101.704                    | 0.778 | 0.940 |
|          | LSTM_Copula | 20.718      | 3458.816                    | 0.819 | 0.934 | 14.441      | 2782.648                    | 0.835 | 0.960 |
|          | GRU_Step    | 19.562      | 3215.930                    | 0.842 | 0.938 | 14.445      | 2860.145                    | 0.826 | 0.950 |
|          | GRU_Copula  | 18.389      | 3163.134                    | 0.847 | 0.937 | 15.407      | 2954.973                    | 0.803 | 0.954 |
|          | GBDT_Step   | 0.640       | 64.080                      | 1.000 | 1.000 | 16.211      | 2962.934                    | 0.752 | 0.953 |
|          | GBDT_Copula | 0.148       | 14.824                      | 1.000 | 1.000 | 17.261      | 2799.659                    | 0.780 | 0.953 |
|          | RF_Step     | 10.770      | 2107.181                    | 0.930 | 0.969 | 15.688      | 2824.587                    | 0.760 | 0.961 |
|          | RF_Copula   | 6.062       | 1121.299                    | 0.980 | 0.991 | 16.734      | 2616.354                    | 0.811 | 0.962 |
|          | SVR_Step    | 11.833      | 2556.120                    | 0.896 | 0.950 | 13.982      | 2823.656                    | 0.783 | 0.957 |
|          | SVR_Copula  | 16.262      | 3311.167                    | 0.828 | 0.919 | 15.517      | 2928.979                    | 0.816 | 0.946 |

**Table S3.** Statistical metrics of 1-month-ahead runoff forecasting results of univariate models for the Gaochang Station and Cuntan Station.

| Station  | Method | Training    |                             |       |       | Testing     |                             |       |       |
|----------|--------|-------------|-----------------------------|-------|-------|-------------|-----------------------------|-------|-------|
|          |        | MAPE<br>(%) | RMSE<br>(m <sup>3</sup> /s) | NSE   | R     | MAPE<br>(%) | RMSE<br>(m <sup>3</sup> /s) | NSE   | R     |
| Gaochang | ARMA   | 13.309      | 640.431                     | 0.885 | 0.946 | 17.473      | 715.578                     | 0.774 | 0.900 |
|          | MGF    | 17.919      | 692.055                     | 0.864 | 0.964 | 27.786      | 866.840                     | 0.517 | 0.949 |
|          | NNBR   | 16.525      | 787.161                     | 0.820 | 0.923 | 19.637      | 789.312                     | 0.633 | 0.939 |
|          | GM     | 18.773      | 843.042                     | 0.755 | 0.907 | 20.667      | 886.644                     | 0.618 | 0.888 |
| Cuntan   | ARMA   | 13.912      | 2846.220                    | 0.871 | 0.939 | 14.387      | 2844.681                    | 0.835 | 0.928 |
|          | MGF    | 14.941      | 3061.850                    | 0.832 | 0.963 | 20.654      | 2847.211                    | 0.772 | 0.959 |
|          | NNBR   | 15.755      | 3068.175                    | 0.837 | 0.927 | 16.890      | 3303.493                    | 0.682 | 0.944 |
|          | GM     | 18.604      | 3674.002                    | 0.742 | 0.901 | 19.230      | 4067.540                    | 0.561 | 0.879 |
